# Supplementary material for: Novel autonomous protein-encoded aptamer nanomachines and isothermal exponential amplification for ultrasensitive fluorescence polarization sensing of small molecules
Source: Royal Society of Chemistry journal article supplement (doi:10.1039/c6ra17959b), 2016-01-01
Supplement: c6ra17959b1.pdf [file c6ra17959b1.pdf]

## Supporting Information

**Novel autonomous protein-encoded aptamer nanomachines and isothermal exponential amplification for ultrasensitive fluorescence polarization sensing of small molecules**

Huakui Huang, Jian Qin, Kun Hu,\* Xiaoqian Liu, Shulin Zhao, and Yong Huang\*

State Key Laboratory for Chemistry and Molecular Engineering of Medicinal Resources, School of Chemistry and Pharmacy, Guangxi Normal University, Yu Cai Road15, Guilin, 541004, P.R. China

E-mail: hukun216@163.com; huangyong\_2009@163.com

Tel: (+86) 773 2120958

Fax: (+86) 7732120958

**Table S1** Oligonucleotide sequences used in this work.

**Table S2** Analysis of different analytes by aptasensors.

**Figure S1.** The effect of CEA concentration on the relative FP value for detection of 40  $\mu\text{M}$  AFB1 by using the amplified nanomachine-based FP sensing method. Error bars were derived from N=5 experiments.

**Figure S2.** The dependence of the relative FP value on the reaction time for detection of 4  $\mu\text{M}$  AFB1 by using the amplified nanomachine-based FP sensing method. Error bars were derived from N=5 experiments.

**Figure S3.** The derived calibration curve corresponding to the increase of the relative P value of the protein-encoded aptamer nanomachine sensing system for AFB1 detection. The correlation equation was  $\Delta P = 45.838\log C + 161.14$  ( $R^2 = 0.9975$ ), where  $\Delta P$  was the relative P value (mP) and C was the AFB1 concentration (nM). Error bars were derived from N=5 experiments.

**Figure S4.** The derived calibration curve corresponding to the increase of the relative P value of the protein-encoded aptamer nanomachine sensing system for cocaine detection. The correlation equation was  $\Delta P = 42.333\log C + 68.829$  ( $R^2 = 0.9966$ ), where  $\Delta P$  was the relative P value (mP) and C was the cocaine concentration (nM). Error bars were derived from N=5 experiments.

**Table S1**

| Name     | Sequences (5'→3')                                                                                                                    |
|----------|--------------------------------------------------------------------------------------------------------------------------------------|
| H1       | <i>GTTGGGCACGTGTTGTCTCTCTGTGTCTCGTGCCCTTCGCT</i><br><i>AGGCCACGTTGCCTCAGCCTTACGTGGGCCTACTGTTTTT</i><br><i>TTATACCAGCTTATTCAATT-2</i> |
| H2       | <i>GGGAGACAAGGATAAATCCTTCAATGAAGTGGGTCTCCCTA</i><br><i>GCTGCCTCAGCCTTGCTAGGGAGACCTGTTTTTTTATACCAG</i><br><i>CTTATTCAATT</i>          |
| Primer-1 | FAM-CAGTAGG                                                                                                                          |
| Primer-2 | FAM-CAGTAGGC                                                                                                                         |
| Primer-3 | FAM-CAGTAGGCC                                                                                                                        |
| Primer-4 | FAM-CAGTAGGCCC                                                                                                                       |
| Primer-5 | FAM-CAGTAGGCCCA                                                                                                                      |
| Primer-6 | FAM-CAGGTCTC                                                                                                                         |

**Table S2**

| Method                                                                      | Detection limit      | Ref.      |
|-----------------------------------------------------------------------------|----------------------|-----------|
| AFB1                                                                        |                      |           |
| Fluorescent aptasensors                                                     | 35 ng/L (0.11 nM)    | 1         |
|                                                                             | 0.1 ng/mL (0.3 nM)   | 2         |
| Electrochemical aptasensor                                                  | 0.05 nM              | 3         |
| Chemiluminescence aptasensor                                                | 0.11 ng/mL (0.35 nM) | 4         |
| Amplified PCR-based fluorescent aptasensor                                  | 25 fg/mL (0.1 pM)    | 5         |
| Autonomous protein-encoded aptamer nanomachine                              | 0.24 pM              | This work |
| Cocaine                                                                     |                      |           |
| Fluorescent aptasensors                                                     | 200 nM               | 6         |
|                                                                             | 0.1 $\mu$ M          | 7         |
|                                                                             | 190 nM               | 8         |
|                                                                             | 10 nM                | 9         |
| Colorimetric aptasensors                                                    | 2 $\mu$ M            | 10        |
|                                                                             | 50 nM                | 11        |
| Amplified eletrochemical aptasensors                                        | 105 pM               | 12        |
|                                                                             | 0.21 nM              | 13        |
|                                                                             | 33 nM                | 14        |
| Silica nanoparticle-enhanced fluorescent aptasensor                         | 209 pM               | 15        |
| Autonomous aptamer machines                                                 | 5 $\mu$ M            | 16        |
|                                                                             | 1 $\mu$ M            | 17        |
| Fluorescent aptasensor based on rolling circle amplification                | 0.48 nM              | 18        |
| SERS aptasensor based on proximity-dependent isothermal cycle amplification | 0.1 nM               | 19        |
| Fluorescent aptasensor based on strand amplification                        | 2 nM                 | 20        |
| Exonuclease III amplified fluorescent aptasensor                            | 50 nM                | 21        |
| Endonuclease amplified fluorescent aptasensors                              | 7 pM                 | 22        |
| Autonomous protein-encoded aptamer nanomachine                              | 18 pM                | This work |

**Figure S1**

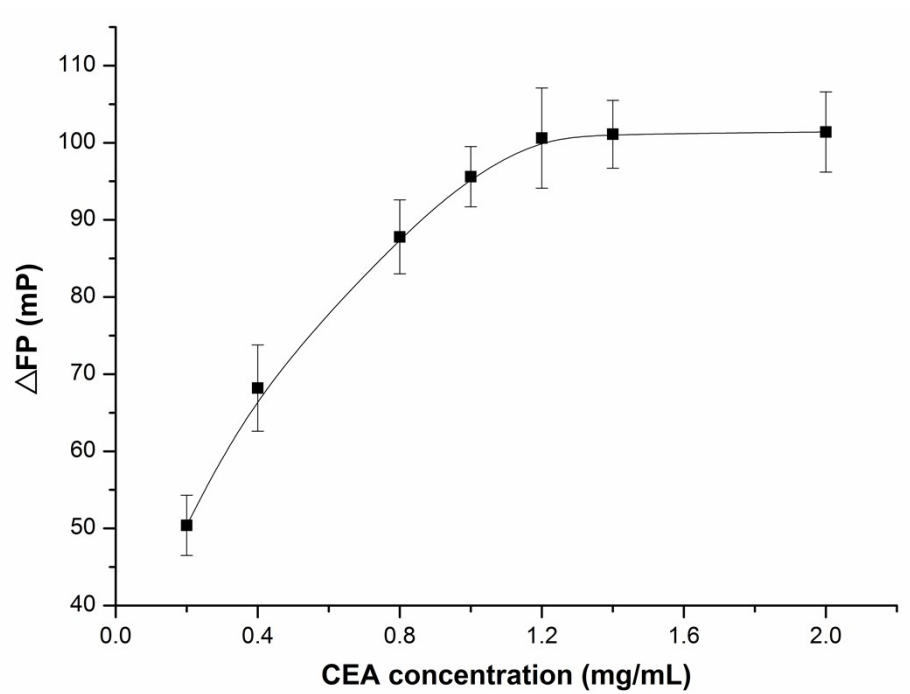

**Figure S2**

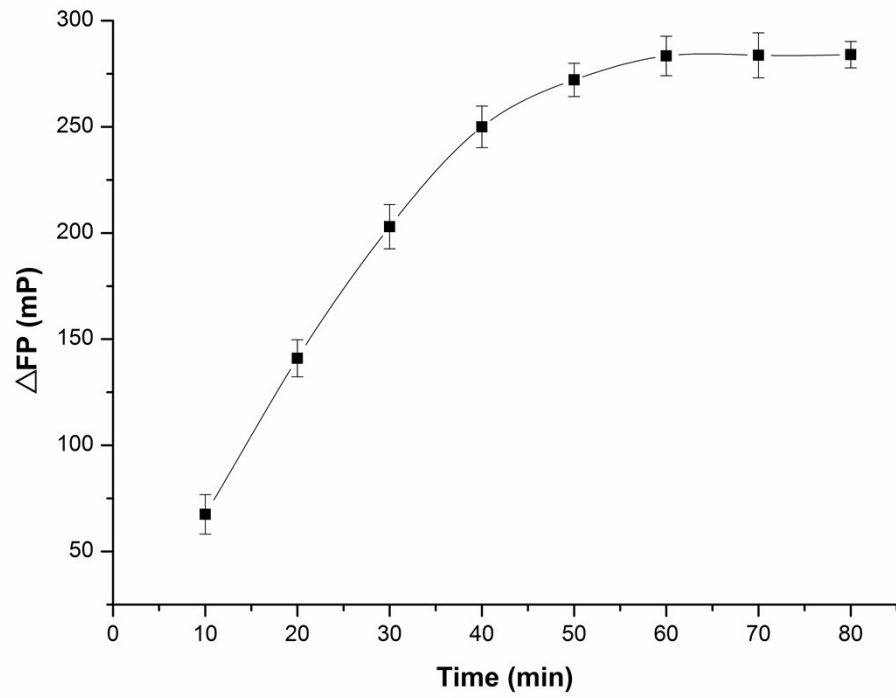

Figure S3

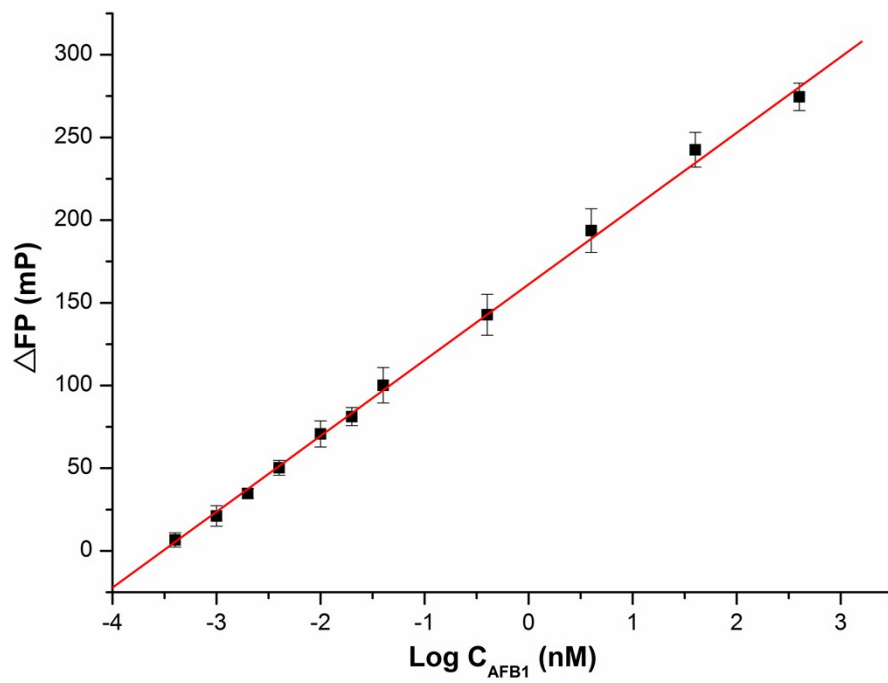

Figure S4

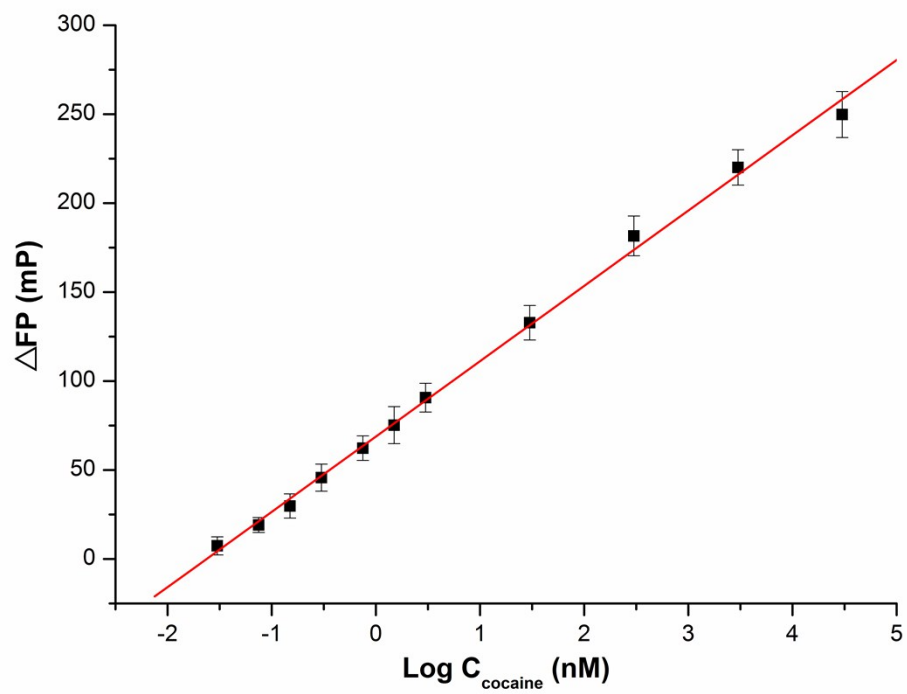



## References

- [1] X. Ma, W. Wang, X. Chen, Y. Xia, S. Wu, N. Duan, Z. Wang, *Eur. Food Res. Technol.* **2014**, 238, 919-925.
- [2] W.-B. Shim, M. J. Kim, H. Mun, M.-G. Kim, *Biosens. Bioelectron.* **2014**, 62, 288-294.
- [3] G. Evtugyn, A. Porfireva, V. Stepanova, R. Sitdikov, I. Stoikov, D. Nikolelis, T. Hianik, *Electroanalysis* **2014**, 26, 2100-2109.
- [4] W.-B. Shim, H. Mun, H.-A. Joung, J. A. Ofori, D.-H. Chung, M.-G. Kim, *Food Control* **2014**, 36, 30-35.
- [5] X. Guo, F. Wen, N. Zheng, Q. Luo, H. Wang, H. Wang, S. Li, J. Wang, *Biosens. Bioelectron.* **2014**, 56, 340-344.
- [6] D. Roncancio, H. Yu, X. Xu, S. Wu, R. Liu, J. Debord, X. Lou, Y. Xiao, *Anal. Chem.* **2014**, 86, 11100-11106
- [7] Z. Zhou, Y. Du, S. Dong, *Biosens. Bioelectron.* **2011**, 28, 33-37.
- [8] L. Qiu, H. Zhou, W. Zhu, L. Qiu, J. Jiang, G. Shen, R. Yu, *New J. Chem.* **2013**, 37, 3998-4003.
- [9] F. Wang, L. Freage, R. Orbach, *Anal. Chem.* **2013**, 85, 8196-8203.
- [10] M. N. Stojanovic, D. W. Landry, *J. Am. Chem. Soc.* **2002**, 124, 9678-9679.
- [11] Y. Du, B. Li, S. Guo, Z. Zhou, M. Zhou, E. Wang, S. Dong. *Analyst*, **2011**, 136,493-497.
- [12] S. M. Taghdisi, N. M. Danesh, A. S. Emrani, M. Ramezani, K. Abnous, *Biosens. Bioelectron.* **2015**, 73, 245-250.

- [13] Q. Sheng, R. Liu , S. Zhang, J. Zheng, *Biosens. Bioelectron.* **2014**, 51,191-194.
- [14] Y. Wen, H. Pei, Y. Wan, Y. Su, Q. Huang, S. Song, C. Fan, *Anal. Chem.* **2011**, 83, 7418–7423.
- [15] A. S. Emrani, N. M. Danesh, M. Ramezani, S. M. Taghdisi, K. Abnous, *Biosens. Bioelectron.* **2016**, 79, 288–293.
- [16] B. Shlyahovsky, D. Li , Y. Weizmann, R. Nowarski, M. Kotler, I. Willner, *J. Am. Chem. Soc.* **2007**, 129, 3814-3815.
- [17] S. Xie, H. Zhou, D. Liu, G. Shen, R. Yu, Z. Wu, *Biosens. Bioelectron.* **2013**, 44, 95-100.
- [18] C. Ma, W. Wang, Q. Yang, C. Shi, L. Cao, *Biosens. Bioelectron.* **2011**, 26, 3309-3312.
- [19] Y. Li, Y. Zeng, Y. Mao, C. Lei, S. Zhang, *Biosens. Bioelectron.* **2014**, 51, 304-309.
- [20] J. He, Z. Wu, H. Zhou, H. Wang, J. Jiang, G. Shen, R. Yu, *Anal. Chem.* **2010**, 82, 1358-1364.
- [21] X. Liu, R. Freeman, I. Willner, *Chem. Eur. J.* **2012**, 18, 2207-2211.
- [22] Q. Li, Y.-D. Wang, G.-L. Shen, H. Tang, R.-Q. Yu, J.-H. Jiang, *Chem. Commun.* **2015**, 51, 4196-4199.a
